# Supplementary material for: Minimally invasive monitoring of cellulose degradation by desorption electrospray ionization and laser ablation electrospray ionization mass spectrometry
Source: Royal Society of Chemistry journal article supplement (doi:10.1039/c0an00155d), 2010-01-01
Supplement: c0an00155d.pdf [file c0an00155d.pdf]

Table 1. Summary of oligosaccharides identified in Whatman 42 paper artificially aged in an oven at 90°C and 50% RH using ESI-MS

| ESI-MS              |                             |        | 144   | 840   | 26856 |
|---------------------|-----------------------------|--------|-------|-------|-------|
| Peaks observed      |                             | Unaged | hours | hours | hours |
| <i>m/z</i>          |                             |        |       |       |       |
| Sodium adducts      |                             |        |       |       |       |
| 365                 | cellobiose                  | X      | X     | X     | X     |
| 527                 | cellotriose                 | X      | X     | X     | X     |
| 689                 | cellotetraose               | X      | X     | X     | X     |
| 851                 | cellopentaose               | X      | X     | X     | X     |
| 1013                | cellohexaose                | X      | X     | X     | X     |
| 1175                | celloheptaose               |        |       | X     | X     |
| 1337                | cellooctaose                |        |       | X     | X     |
| 1499                | cellononaose                |        |       |       | X     |
| Sodium-bound dimers |                             |        |       |       |       |
| 707                 | cellobiose-cellobiose       | X      | X     | X     | X     |
| 869                 | cellobiose-cellotriose      | X      | X     | X     | X     |
| 1031                | cellobiose-cellotetraose    | X      | X     | X     | X     |
|                     | cellotriose-cellotriose     | X      | X     | X     | X     |
| 1193                | cellotriose-cellotetraose   | X      | X     | X     | X     |
| 1355                | cellotetraose-cellotetraose | X      | X     | X     | X     |
|                     | cellotriose-cellopentaose   | X      | X     | X     | X     |
| 1517                | cellotetraose-cellopentaose |        |       | X     | X     |
| 1679                | cellopentaose-cellopentaose |        |       |       | X     |

Table 2. Summary of oligosaccharides identified in Whatman 42 paper artificially aged in an oven at 90°C and 50% RH using DESI-MS

| DESI-MS             |                             |        |           |           |             |
|---------------------|-----------------------------|--------|-----------|-----------|-------------|
| Peaks observed      |                             | Unaged | 144 hours | 840 hours | 26856 hours |
| Sodium adducts      |                             |        |           |           |             |
| 365                 | cellobiose                  | X      | X         | X         | X           |
| 527                 | cellotriose                 | X      | X         | X         | X           |
| 689                 | cellotetraose               | X      | X         | X         | X           |
| 851                 | cellopentaose               | X      | X         | X         | X           |
| 1013                | cellohexaose                |        |           | X         | X           |
| 1175                | celloheptaose               |        |           | X         | X           |
| 1337                | cellooctaose                |        |           |           | X           |
| 1499                | cellononaose                |        |           |           | X           |
| 1662                | cellodecaose                |        |           |           | X           |
| Sodium-bound dimers |                             |        |           |           |             |
| 707                 | cellobiose-cellobiose       | X      |           | X         | X           |
| 869                 | cellobiose-cellotriose      |        |           | X         | X           |
| 1031                | cellobiose-cellotetraose    |        |           | X         | X           |
|                     | cellotriose-cellotriose     |        |           | X         | X           |
| 1193                | cellotriose-cellotetraose   |        |           | X         |             |
| 1355                | cellotetraose-cellotetraose |        |           |           |             |
| 1517                | cellotetraose-cellopentaose |        |           |           |             |
| 1679                | cellopentaose-cellopentaose |        |           |           |             |
| Potassium adducts   |                             |        |           |           |             |
| 381                 | cellobiose                  | X      | X         | X         | X           |
| 543                 | cellotriose                 | X      |           | X         | X           |

Table 3. Summary of oligosaccharides identified in Whatman 42 paper artificially aged in an oven at 90°C and 50% RH using LAESI-MS

| LAESI-MS          |               |        |              |              |                |
|-------------------|---------------|--------|--------------|--------------|----------------|
| Peaks observed    |               | Unaged | 144<br>hours | 840<br>hours | 26856<br>hours |
| Potassium adducts |               |        |              |              |                |
| 219               | glucose       |        | X            | X            | X              |
| 381               | cellobiose    | X      | X            | X            | X              |
| 543               | cellotriose   |        | X            | X            | X              |
| 705               | cellotetraose |        | X            | X            | X              |
| 867               | cellopentaose |        |              | X            | X              |
| 1029              | cellohexaose  |        |              |              | X              |
| 1191              | celloheptaose |        |              |              | X              |
| 1353              | cellooctaose  |        |              |              | X              |
| Sodium adducts    |               |        |              |              |                |
| 365               | cellobiose    |        |              |              | X              |
